# Supplementary material
Source: PubMed Central journal article supplement (PMC9345572)
Supplement: NIHMS1790306-supplement-1.pdf [file NIHMS1790306-supplement-1.pdf]

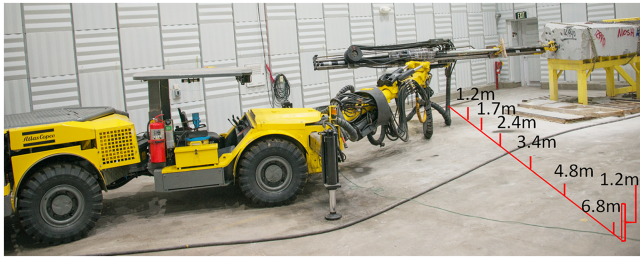

*Fig. S1—Laboratory experiment setup in the NIOSH hemi-anechoic chamber.*

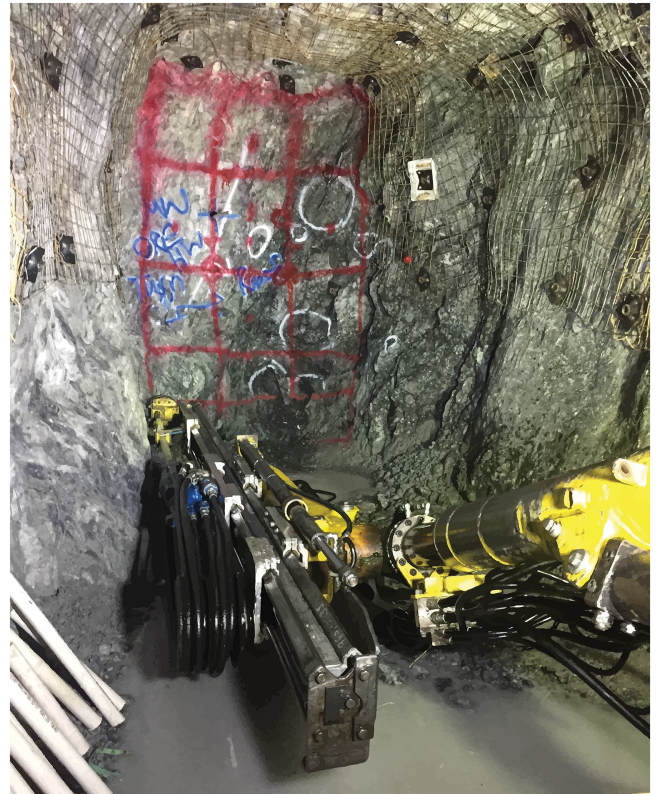

*Fig. S2—Field evaluation setup at a mining face in the studied underground metal mine.*

*Table S1—Contribution of the different types of operation and external microphones to the overall accuracy of the app.*

| Factors             | <i>F</i> | $\sigma$ | Partial $\eta^2$ | Observed power <sup>a</sup> |
|---------------------|----------|----------|------------------|-----------------------------|
| Operation           | 25.504   | <0.001   | .586             | 0.997                       |
| External microphone | 45.187   | <0.001   | .715             | 1.000                       |
| Distance            | 27.040   | <0.001   | .600             | 1.000                       |

a. Computed using alpha = .05.

*Table S2—Pair-wise comparisons of the app accuracy between each pair of distances measured in the laboratory test.*

| Distance<br>( <i>I</i> )<br>(meters) | Distance<br>( <i>J</i> )<br>(meters) | Mean<br>difference<br>( <i>I</i> – <i>J</i> )<br>(dB) | $\sigma$ | 95% CI |        |
|--------------------------------------|--------------------------------------|-------------------------------------------------------|----------|--------|--------|
|                                      |                                      |                                                       |          | Lower  | Upper  |
| 1.7                                  | 2.4                                  | –0.068                                                | 1.000    | –0.356 | 0.221  |
|                                      | 3.4                                  | –1.249                                                | 0.000    | –1.897 | –0.601 |
|                                      | 4.8                                  | –0.812                                                | 0.000    | –1.239 | –0.386 |
| 2.4                                  | 3.4                                  | –1.182                                                | 0.000    | –1.816 | –0.547 |
|                                      | 4.8                                  | –0.745                                                | 0.000    | –1.150 | –0.340 |
| 3.4                                  | 4.8                                  | 0.437                                                 | 0.031    | 0.030  | 0.844  |
